# Supplementary material for: Professional development in evidence-based practice: course survey results to inform administrative decision making
Source: PubMed Central journal article supplement (PMC6579596; doi:10.5195/jmla.2019.628), 2019-07-01
Supplement: jmla-107-394-s001.pdf [file jmla-107-394-s001.pdf]

## Professional development in evidence-based practice: course survey results to inform administrative decision making

Deborah L. Lauseng; Carmen Howard; Emily M. Johnson, AHIP

### APPENDIX

#### Past evidence-based practice (EBP) course participants survey, 2017

What environment were you employed in when you attended the evidence-based practice (EBP) course? (select one)

- Public library
- Academic library (other than health sciences)
- Academic health sciences library
- Hospital library
- Nonlibrary clinical/health care setting
- Retired
- Other? Please specify: \_\_\_\_\_

Please check the academic degrees you hold and the year that degree was obtained.

|                                                                                                                                              | Academic degree<br>(select all that apply) | Year degree obtained<br>(indicate year) |
|----------------------------------------------------------------------------------------------------------------------------------------------|--------------------------------------------|-----------------------------------------|
| Bachelor of art or science (BA/BS)                                                                                                           | <input type="radio"/>                      |                                         |
| Master of library science, library and information science, or information science or master's of art in library science (MLS/MLIS/MIS/AMLS) | <input type="radio"/>                      |                                         |
| Bachelor of science in nursing (BSN)                                                                                                         | <input type="radio"/>                      |                                         |
| Master of science in nursing (MSN)                                                                                                           | <input type="radio"/>                      |                                         |
| Doctor of nursing practice (DNP)                                                                                                             | <input type="radio"/>                      |                                         |
| Master of social work (MSW)                                                                                                                  | <input type="radio"/>                      |                                         |
| Medical degree (MD)                                                                                                                          | <input type="radio"/>                      |                                         |
| Doctorate (PhD)                                                                                                                              | <input type="radio"/>                      |                                         |
| Other degrees?<br>Please specify:                                                                                                            | <input type="radio"/>                      |                                         |

During your professional degree program, did you receive any training or instruction on evidence-based medicine (EBM)/EBP?

- Yes
- No

If yes, indicate the type of EBP training you received. (select all that apply)

- A full course on EBM/EBP
- Modules within another course
- Workshop
- Webinar
- Certificate program
- Other? Please explain: \_\_\_\_\_

Where did you receive your professional degree?

---

Prior to participating in the EBP course, did you have previous training on EBP? (select all that apply)

- Autodidactic (read books or articles on the topic)
- Journal club
- Medical Library Association continuing education (CE)
- Other accredited CE. Please specify: \_\_\_\_\_
- Training (no-CE) through presentation or workshop
- Informal training through colleague
- Other? Please explain: \_\_\_\_\_
- No previous training

What library or information environment are you currently working in? (select one)

- Public library
- Academic library (other than health sciences)
- Academic health sciences library
- Hospital library
- Nonlibrary academic setting
- Nonlibrary clinical/health care setting
- Was not employed
- Retired
- Other? Please specify: \_\_\_\_\_

Which professional organizations do you currently belong to? (select all that apply)

- American Library Association
- American Medical Association
- American Nurses Association
- Association of College and Research Libraries
- Medical Library Association
- Academy of Health Information Professionals
- Special Libraries Association
- Other? Please list: \_\_\_\_\_

What topics were most valuable in the EBP course? Select the top three.

- Evolution of Evidence-Based Practice
- Research Study Methodology
- Developing the Answerable Question Using Problem, Intervention, Comparison, Outcome (PICO)
- Searching for the Evidence in the Literature
- Introduction to Critical Appraisal
- Use of Critically Appraised Topics (CATS)
- Critically Appraising the Diagnostic Literature
- Critically Appraising the Therapy Literature
- Other, not listed above. Please list: \_\_\_\_\_

What activities were most valuable in the EBP course? Select the top two.

- The unit-based lectures
- The unit-based readings
- Exploring websites
- Quizzes (check your understanding)
- Exploring the University of Illinois at Chicago (UIC) evidence-based medicine resources and guide
- CAT exercises
- Other, not listed above. Please specify: \_\_\_\_\_

Did the following assignments reinforce the unit learning objectives? Rate on a scale of 5 to 1 where 5=Strongly agree and 1=Strongly disagree, or select 0=Don't recall the assignment.

|                                                                                                                                                                                                                                                                                                    | 5=<br>Strongly<br>agree | 4=<br>Agree           | 3=<br>Neutral         | 2=<br>Disagree        | 1=<br>Strongly<br>disagree | 0=<br>Don't recall<br>the<br>assignment |
|----------------------------------------------------------------------------------------------------------------------------------------------------------------------------------------------------------------------------------------------------------------------------------------------------|-------------------------|-----------------------|-----------------------|-----------------------|----------------------------|-----------------------------------------|
| PICO assignment<br>(Objective: formulate a question using the PICO format)                                                                                                                                                                                                                         | <input type="radio"/>   | <input type="radio"/> | <input type="radio"/> | <input type="radio"/> | <input type="radio"/>      | <input type="radio"/>                   |
| Find Evidence in PubMed<br>(Objectives: conduct an effective literature search to find the best evidence, employ advanced search strategies for filtering out the best evidence in PubMed)                                                                                                         | <input type="radio"/>   | <input type="radio"/> | <input type="radio"/> | <input type="radio"/> | <input type="radio"/>      | <input type="radio"/>                   |
| Critically appraise two diagnostic articles, and create a CAT for each<br>(Objectives: apply appropriate criteria in appraising an article for validity and evidence, evaluate the quality of statistical methodology in the clinical literature, and produce a formal EBM analysis using the CAT) | <input type="radio"/>   | <input type="radio"/> | <input type="radio"/> | <input type="radio"/> | <input type="radio"/>      | <input type="radio"/>                   |
| Critically appraise one therapy article and create a CAT<br>(Objectives: apply appropriate criteria in appraising an article for validity and evidence, evaluate the quality of statistical methodology in the clinical literature, and produce a formal EBM analysis using the CAT)               | <input type="radio"/>   | <input type="radio"/> | <input type="radio"/> | <input type="radio"/> | <input type="radio"/>      | <input type="radio"/>                   |
| Capstone<br>(only for those completing a final summary project)                                                                                                                                                                                                                                    | <input type="radio"/>   | <input type="radio"/> | <input type="radio"/> | <input type="radio"/> | <input type="radio"/>      | <input type="radio"/>                   |

What was the primary take-away for you in participating in this EBP online course?

---

What content from the class have you been able to apply to your work responsibilities? (select all that apply)

- Evolution of Evidence-Based Practice
- Research Study Methodology
- Developing the Answerable Question Using PICO
- Searching for the Evidence in the Literature
- Introduction to Critical Appraisal
- Use of CATS
- Critically Appraising the Diagnostic Literature
- Critically Appraising the Therapy Literature
- Other, not listed above. Please list: \_\_\_\_\_

Please provide an example of course content applied to your work responsibilities:

---

How has your work changed as a result of increasing your knowledge of EBP through this course?

|                                 | Yes/No                |                       | If Yes, please describe: |
|---------------------------------|-----------------------|-----------------------|--------------------------|
|                                 | Yes                   | No                    | (please describe)        |
| New work responsibilities       | <input type="radio"/> | <input type="radio"/> |                          |
| New role within the institution | <input type="radio"/> | <input type="radio"/> |                          |
| Change in job                   | <input type="radio"/> | <input type="radio"/> |                          |
| Other?                          | <input type="radio"/> | <input type="radio"/> |                          |

Have you taken additional formalized EBP training since participating in this course?

- Yes
- No

If yes, please select all that apply:

- For-credit degree course
- For-credit non-degree course
- Medical Library Association CE
- Other accredited CE

Which of these EBP topics are of interest to you for future CE opportunities? (select all that apply)

- Conducting critical appraisals
- Teaching critical appraisal skills
- Conducting systematic reviews
- Teaching systematic review process
- Teaching evidence-based decision making
- Conducting your own evidence-based research
- Other? Please describe: \_\_\_\_\_
